# Supplementary material for: Non-invasive cortisol measurements as indicators of physiological stress responses in guinea pigs
Source: PeerJ. 2016 Jan 18;4:e1590. doi: 10.7717/peerj.1590 (PMC4734438; doi:10.7717/peerj.1590)
Supplement: Supplemental Information 1 [file peerj-04-1590-s001.xlsx]

## Sheet: Tabelle1
Experiment 1																																						Experiment 2
Animal	Plasma cortisol						Saliva cortisol						FGM						CV Plasma cortisol						CV Saliva cortisol						CV FGM							Animal	Saliva cortisol			FGM
	Iso1	Iso2	Iso3	Soc1	Soc2	Soc3	Iso1	Iso2	Iso3	Soc1	Soc2	Soc3	Iso1	Iso2	Iso3	Soc1	Soc2	Soc3	Iso1	Iso2	Iso3	Soc1	Soc2	Soc3	Iso1	Iso2	Iso3	Soc1	Soc2	Soc3	Iso1	Iso2	Iso3	Soc1	Soc2	Soc3			Base	postSoc	postSoc24	Base1	Base2	Base3	postSoc2	postSoc4	postSoc6	postSoc8	postSoc10
M01	198.42	130.37	72.15	107.69	124.72	80.86	12.67	23.55	24.38	2.91	3.22	1.85	1127.38	395	452.86	66.94	85.66	166.7	5.17395	4.52761	3.74131	0.262377	0.529668	6.01793	0.707107	1.49652	1.15289	4.52548	1.73169	3.27617	4.00027	2.88615	2.16964	5.21636	2.38686	0.979825		M21	19.3968	82.4822	4.20458	368.62	328.82	691.99	223.3	588.46	816.3	667.38	663.98
M02	27.99	19.93	23.92	545.76	218.19	221	3.04	2.84	37.72	15.47	7.52	28.93	664.01	623.59	704.42	491.67	219.61	932.69	5.12235	0.433808	3.53553	1.34049	0	3.47757	6.67654	4.41942	3.83371	2.39697	3.43407	10.9366	3.32198	3.53034	3.20926	3.2799	0.844811	2.65165		M22	15.5495	20.5441	14.2594	232.62	236.2	132.01	151.82	348.93	400.54	240.15	217.35
M03	11.86	214.46	38.32	420.24	271.34	140.42	4.08	7.32	23.96	7.67	3.22	2.1	521.97	313.19	232.93	34.14	56.95	105.69	1.04447	5.21636	0.457674	0	3.00897	2.16738	1.19849	1.63682	0	1.869	4.56198	1.92223	0.201168	1.47314	3.87939	0.541844	8.55371	1.67453		M23	16.5264	79.0429	6.37649	139.68	244.73	317.58	1288.63	1388.87	1275.67	1167.8	766.62
M04	3.96	16.47	23.92	762.81	575.41	378.95	2.56	9.47	3.32	12.12	31.68	9.29	534.32	1102.69	573	392.05	1156.99	597.64	1.37302	3.40774	3.07438	6.80255	3.76667	2.52538	0.279489	10.3566	3.94402	4.24591	7.28186	4.76701	3.63655	6.29057	3.67859	6.13259	7.66323	1.80538		M24	21.9442	38.4254	4.49664	231.44	233.81	356.03	261.33	444.02	624.94	677.63	377.59
M05	9.06	28.96	26.12	517.78	553.02	732.35	1.28	4.61	7.98	65.98	14.35	117.61	203.16	63.97	102.14	37.21	26.99	55.32	5.98718	3.58029	3.58029	8.08122	3.05226	1.43575	0.261891	0.914362	2.24989	4.19026	3.38329	7.14249	0	3.37448	2.89271	0.822217	3.59208	4.26825		M25	9.17284	170.984	3.95439	452.16	363.16	256.13	347.3	343.79	1423.76	778.68	672.44
M06	154.84	73.19	125.25	278.38	393.9	285.61	5.66	8.11	70.33	37.95	25	51.45	742.73	1135.78	1438.38	813.92	406.71	715.31	2.49079	0.743019	3.4493	4.79394	1.26835	17.452	5.56519	1.92847	4.68283	10.8786	5.89256	10.3077	3.4493	4.68283	5.25637	2.15581	1.87561	2.31149		M26	5.9846	22.6078	5.43677	389.33	330.47	556.31	576.62	591.43	1423.76	811.98	760.3
M07	39.56	44.16	150.82	1128.33	511.01	517.78	25.24	27.06	62	49.65	54.27	36.61	266.03	568.56	542.71	284.73	161.43	51.14	2.69374	4.47089	2.43364	0.77704	7.05427	3.69509	2.74986	0.794502	1.35982	3.68925	3.68925	12.4326	2.16461	3.06107	1.22266	2.82137	1.6218	1.8257		M27	7.00858	51.9873	5.50727	78.07	138.9	133.51	149.61	231.54	229.12	287.24	80.53
M08	117.12	165.34	193.34	553.02	648.67	497.8	4.3	28.02	13.34	10.22	17.62	22.4	56.78	70.83	156.93	26.37	162.74	8.75	1.31677	3.34066	0.28341	7.40779	6.66751	4.62593	3.20089	4.44467	4.75937	2.27575	2.11077	7.14249	2.88615	1.85268	2.85191	2.64834	2.27053	8.72365		M28	6.21722	87.4774	6.41696	189.19	231.44	323.96	319.1	538.1	681.07	402.5	529.18
M09	100.88	21.07	150.82	191.84	133.23	177.53	10.86	5.11	85.87	9.84	14.63	12.59	72.62	58.33	71.73	42.2	3.14	31.61	6.78405	2.38229	1.65728	3.7141	0.26633	3.62619	2.3683	5.43928	3.29983	0	1.6957	5.7106	2.79121	1.06791	0	2.63174	1.87935	5.66765		M29	7.00858	62.5102	5.06276	626.31	547.84	978.45	969.44	893.58	1764.22	1202.35	921.86
M10	18.84	42.14	102.05	404.24	48.81	126.38	20.51	4.45	12.48	194.14	90.53	8.77	704.42	210.79	81.17	340.72	53.2	158.85	3.85695	4.18682	0	5.75924	5.63806	8.97076	6.25067	3.50631	0.732753	3.62619	8.00498	7.6444	7.42091	3.12725	1.18097	2.37223	1.69367	3.55168		M30	14.5454	102.406	9.82856	485.08	512.8	370.44	485.11	688.05	1077.75	943.28	624.69
M11	257.79	616.26	159.03	1265.93	1960.36	1002.16	2.79	12.87	11.61	100.76	332.85	251.71	383.5	320.33	257.16	321.36	342.95	345.45	6.25231	4.13916	3.08047	5.23783	1.32998	8.91148	3.10506	4.30557	2.6311	2.70232	3.53553	6.29812	2.58472	0.354439	3.1427	0.75091	7.31055	4.98115
M12	153.9	225.91	135.94	1055.63	834.52	371.97	19.33	7.76	1.63	97.49	318.11	55.46	1116.1	138.99	142.75	278.34	446.39	456.97	2.18411	4.37386	4.08732	5.35108	4.37386	6.49857	14.7754	5.00607	1.09629	4.8766	5.79596	10.1305	2.2958	3.2686	4.46124	0.48432	5.78303	1.84865
M13	66.39	350.72	90.56	1815.37	1440.43	262.23	17.95	39.08	2.41	327.86	207.1	63.99	899.84	251.35	297.6	484.64	830.58	1598.21	1.70387	2.83473	2.59013	1.73523	2.88615	4.91649	6.60198	3.4681	2.51044	2.37683	4.73157	2.51044	4.40565	2.1683	1.47314	2.41517	1.19849	1.91975
M14	316.48	204.91	81.67	976.29	1815.37	189.39	102.31	53.07	3.84	124.63	213.64	27.27	1365.98	695.69	275.24	1060.98	952.68	408.67	1.84463	6.40179	3.31257	0.377124	3.86867	3.23866	11.8611	7.56114	10.2479	6.55596	7.38768	9.76567	2.64115	4.58045	0.97532	1.90253	3.37448	1.01095
M15	304.52	84.13	109.5	658.44	1217.72	322.96	5.4	1.63	12.35	60.74	146.38	107.71	81.91	164.75	361.83	415.06	688.8	472.79	3.06107	2.83358	3.70768	2.45645	2.39697	8.98865	6.67654	1.92223	5.63036	5.26784	4.8766	3.72161	2.51745	1.36419	2.04958	4.69665	4.63677	3.96073
M16	129.76	75.83	154.58	554.07	187.23	176.76	3.86	2.66	3.26	144.06	50.35	9.43	725.64	294.32	324.88	138.99	287.48	374.41	2.12664	0	2.79489	6.08991	3.52875	7.84172	5.4949	7.62151	1.60706	10.5826	9.95925	4.47941	2.92884	0.740426	1.00299	2.43448	4.45503	2.41934
M17	226.76	360.38	293.69	259.47	259.34	76.69	14.9	30.25	99.12	86.78	36.09	8.21	145.28	137.12	223.78	171.15	314.58	658.74	3.19432	4.45923	4.58169	3.61076	7.84061	1.19646	0.340774	1.11355	3.58029	7.80854	0.377124	1.88562	3.35576	4.00249	0.469838	3.66139	1.80087	1.64296
M18	289.69	423.87	270.43	667.2	498.34	280.14	4.74	17.04	4.85	66.2	58.19	153.59	484.64	354.19	196.15	284.65	312.49	338.59	3.95372	7.13594	3.30283	2.4687	10.8281	6.37555	8.21535	8.23814	11.6605	11.6465	2.86942	9.49472	2.14275	6.68717	2.05621	4.16666	4.75988	0.2146
M19	323.2	592.2	471.99	1002.07	182.98	219.43	102.44	17.04	95.89	94.31	39.28	116.05	171.15	63.89	166.87	106.55	109.2	118.25	0	4.13916	3.66032	6.84297	0.271442	8.08919	5.43928	0.342425	6.73435	1.77888	2.28099	2.82843	6.20874	2.06154	5.03442	1.08286	0.513637	0.174164
M20	258.24	222.79	293.69	951.14	312.56	447.17	4.42	2.73	4.53	22.81	116.05	38.62	260.1	52.24	11.84	148.53	127.11	620.69	4.07946	0.878394	3.64175	12.7204	5.0614	4.83216	5.63314	7.68285	5.63314	6.36396	9.30404	4.8766	1.20052	0.405219	1.87561	4.01512	1.40718	4.11181
[truncated: 7 more columns]
